# Supplementary material for: Liquid-phase catalytic hydrodechlorination of chlorinated organic compounds in a continuous flow micro-packed bed reactor over a Pd/AC catalyst
Source: Royal Society of Chemistry journal article supplement (doi:10.1039/d2re00043a), 2022-01-01
Supplement: d2re00043a1.pdf [file d2re00043a1.pdf]

## Electronic Supplementary Information

### **Liquid-phase catalytic hydrodechlorination of chlorinated organic compounds in continuous flow micro-packed bed reactor over Pd/AC catalyst**

Zipin Peng<sup>a,b</sup>, Xuepeng Wang<sup>a</sup>, Zheng Li<sup>a</sup>, Xingkun Chen<sup>a\*</sup>, Yunjie Ding<sup>a,c\*</sup>, Jisong Zhang<sup>b\*</sup>

<sup>a</sup>Hangzhou Institute of Advanced Studies, Zhejiang Normal University, 1108 Gengwen Road, Hangzhou 311231, PR China

<sup>b</sup>The State Key Laboratory of Chemical Engineering, Department of Chemical Engineering, Tsinghua University, Beijing 100084, China.

<sup>c</sup>Dalian National Laboratory for Clean Energy, Dalian Institute of Chemical Physics, Chinese Academy of Sciences 457 Zhongshan Road, Dalian 116023, PR China

## Table of Content

### 1. Calculation of internal diffusion

### 2. Determination of adsorption equilibrium

#### 1. Calculation of internal diffusion

In order to determine the effect of internal mass transfer, the Thiele modulus and efficiency factor were calculated using equations (S1, S2, S3) and the equation (S4), respectively:

$$D_m = 7.4 \times 10^{-8} \left[ \frac{(\varphi M)^{0.5} T}{\mu V^{0.6}} \right] \quad \# (S1)$$

$$D_{eff} = D_m \frac{\varepsilon}{\text{tortuosity}} \quad \# (S2)$$

$$\phi = L \sqrt{\frac{k}{D_{eff}}} \quad \# (S3)$$

$$\eta = \frac{\varepsilon}{\phi} \left( \frac{1}{\tanh \phi} - \frac{1}{\phi} \right) \quad \# (S4)$$

The values supporting this calculation are summarized in Table S1.

Table S1 Values of symbols in internal diffusion of chlorobenzene.

| Symbols        | Significance                                                   | Value                                      |
|----------------|----------------------------------------------------------------|--------------------------------------------|
| $\varphi$      | "Association parameter" for the solvent                        | 1.0 <sup>[1]</sup>                         |
| $M$            | Molecular weight of solvent (methanol)                         | 32.04 g/mol                                |
| $T$            | Temperature                                                    | 353.15 K                                   |
| $\mu$          | Viscosity of solvent (methanol)                                | 1.16 mPa·s <sup>[2]</sup>                  |
| $V$            | Molar volume of solute at its normal boiling point             | 101.3 for CB <sup>[3]</sup>                |
| $\varepsilon$  | porosity                                                       | 0.38 <sup>[1]</sup>                        |
|                | tortuosity                                                     | 2.7 <sup>[1]</sup>                         |
| $L$            | Characteristic length of catalyst particles (L=R/3 for sphere) | 0.12 mm                                    |
| $k$            | Apparent reaction rate constant                                | 0.0042 s <sup>-1</sup>                     |
| $D_m$ (CB)     | Molecular diffusion coefficient of CB                          | 7.98 × 10 <sup>-10</sup> m <sup>2</sup> /s |
| $D_{eff}$ (CB) | Effective diffusion coefficient of CB                          | 1.09 × 10 <sup>-10</sup> m <sup>2</sup> /s |

|                  |                         |       |
|------------------|-------------------------|-------|
| $\emptyset$ (CB) | Thiele modulus of CB    | 0.905 |
| $\eta$ (CB)      | Efficiency factor of CB | 0.948 |

[1] C. Yang, A.R. Teixeira, Y. Shi, S.C. Born, H. Lin, Y. Song, B. Martin, B. Schenkel, M.P. Lachegurabi and K.F. Jensen, Catalytic Hydrogenation of N-4-nitrophenyl Nicotinamide in a Micro-Packed Bed Reactor, *Green Chem.*, 2018, **20**, 886-893.

[2] R. A. Lewis, *Hawley's condensed chemical dictionary*, John Wiley & Sons, 2016.

[3] N.T. Program, National Toxicology Program Chemical Repository Database. Research Triangle Park, North Carolina: NTP via <http://httn.canieochemicals.noaa.gov/chemical/20568>.

## 2. Determination of adsorption equilibrium

Based on the adsorption characteristics accompanied by high specific surface area of the carrier, we experimentally determined the conditions for adsorption saturation of the system and then tested these samples. The experimental result is shown in the Fig. S1.

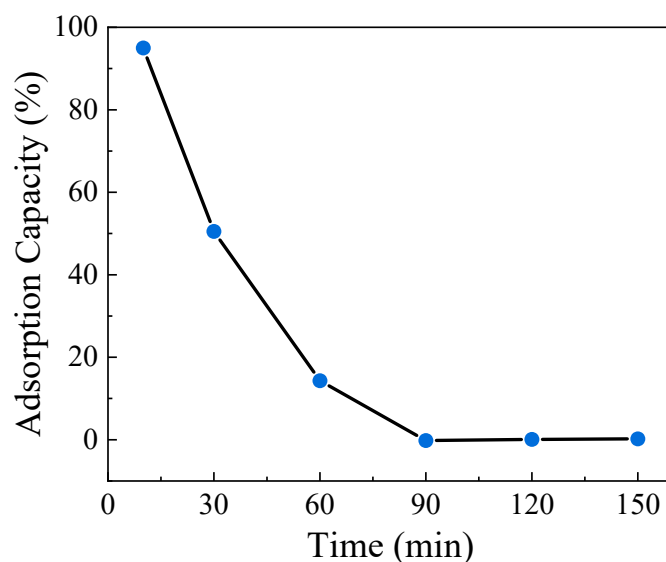

**Fig. S1.** The curve of adsorption capacity as a function of reaction time.
